# Supplementary material
Source: PubMed Central journal article supplement (PMC11139772)
Supplement: svn-2022-002246supp001.pdf [file svn-2022-002246supp001.pdf]

**Table S1. General data of patients with TIA.**

| Serum No.   | Gender               | Age              | Height        | Weight       | BMI                          | Blood pressure                                                                           | Smoking           | Smoking period | Alcohol           | Alcohol Freq. |
|-------------|----------------------|------------------|---------------|--------------|------------------------------|------------------------------------------------------------------------------------------|-------------------|----------------|-------------------|---------------|
| Total<br>23 | 1: Male<br>2: Female | Average<br>67.09 | (cm)<br>160.8 | (kg)<br>64.3 | (kg/m <sup>2</sup> )<br>24.5 | 1: <120/80mmHg<br>2: ~139/89mmHg<br>3: ~159/99mmHg<br>4: ~179/109mmHg<br>5: >180/110mmHg | 0: None<br>1: Yes | (year)         | 0: None<br>1: Yes | (time/w)      |
| 02108       | 1                    | 55               | 172.0         | 76.5         | 26.0                         | 3                                                                                        | 1                 | 40             | 0                 | 0             |
| 02129       | 1                    | 69               | 148.0         | 45.5         | 21.0                         | 4                                                                                        | 0                 | 0              | 1                 | 1             |
| 02135       | 2                    | 69               | 141.0         | 50.0         | 25.1                         | 5                                                                                        | 0                 | 0              | 0                 | 0             |
| 02136       | 1                    | 70               |               | 75.0         |                              | 5                                                                                        | 1                 | 50             | 0                 | 0             |
| 02180       | 1                    | 53               | 170.0         | 68.0         | 23.5                         | 3                                                                                        | 1                 | 33             | 1                 | 7             |
| 02256       | 1                    | 67               | 168.0         | 75.0         | 26.6                         | 5                                                                                        | 0                 | 0              | 1                 | 4             |
| 02265       | 1                    | 92               | 150.0         | 60.0         | 26.7                         | 5                                                                                        | 1                 |                | 1                 | 7             |
| 02267       | 1                    | 67               | 170.5         | 73.0         | 25.1                         | 4                                                                                        | 1                 |                | 0                 | 0             |
| 02269       | 2                    | 80               | 137.0         | 38.0         | 20.2                         | 3                                                                                        | 1                 |                | 1                 | 0             |
| 02271       | 1                    | 73               | 163.5         | 56.5         | 21.1                         | 3                                                                                        | 1                 |                | 1                 | 0             |
| 02272       | 1                    | 71               | 165.0         | 81.0         | 29.8                         | 3                                                                                        | 1                 | 51             | 0                 | 0             |
| 02278       | 1                    | 71               | 166.0         | 69.0         | 25.0                         | 3                                                                                        | 1                 |                | 0                 | 0             |
| 02280       | 1                    | 64               | 160.0         | 78.0         | 30.5                         | 5                                                                                        | 1                 | 30             | 0                 | 0             |
| 02284       | 1                    | 55               | 169.5         | 77.0         | 26.8                         | 5                                                                                        | 0                 | 0              | 1                 | 0             |
| 02291       | 1                    | 73               | 164.0         | 56.0         | 20.8                         | 3                                                                                        | 1                 |                | 1                 | 1             |
| 02297       | 2                    | 84               | 148.0         | 51.0         | 23.3                         | 3                                                                                        | 0                 | 0              | 0                 | 0             |
| 02304       | 1                    | 55               | 172.0         | 78.0         | 26.4                         | 5                                                                                        | 0                 | 0              | 1                 | 1             |
| 02310       | 1                    | 70               | 170.0         | 61.0         | 21.1                         | 5                                                                                        | 1                 | 50             | 1                 | 7             |
| 02322       | 1                    | 59               | 188.0         | 75.0         | 21.2                         | 3                                                                                        | 0                 | 0              | 1                 | 7             |
| 05874       | 2                    | 83               | 150.0         | 50.0         | 22.2                         | 1                                                                                        | 0                 | 0              | 0                 | 0             |
| 06150       | 2                    | 49               | 152.0         | 53.0         | 22.9                         | 3                                                                                        | 0                 | 0              | 0                 | 0             |
| 07405       | 2                    | 57               |               |              |                              | 1                                                                                        | 0                 | 0              | 0                 | 0             |
| 07366       | 2                    | 57               | 153.0         | 67.0         | 28.6                         | 3                                                                                        | 0                 | 0              | 0                 | 0             |

This table describes the gender, age, height, weight, BMI, blood pressure, smoking habit and alcohol habit of a total of 23 TIA patients.

**Table S2. Results of homology search using BLAST for monoclonal antigen by SEREX.**

| Clone No. | Gene full name (Homology)                                                                                | Accession No. | Query cover | CDS       | Start site of cloned region |
|-----------|----------------------------------------------------------------------------------------------------------|---------------|-------------|-----------|-----------------------------|
| 108-C-F   | Matrix Metalloproteinase 1 (Interstitial Collagenase) (MMP1)                                             | NM_002421     | 99%         | 144..1553 | 90                          |
| 108-E-F   | Secreted Protein Acidic and Cysteine Rich (osteonectin) (SPARC)                                          | NM_003118     | 99%         | 204..1115 | 578                         |
| 108-G-F   | 5'-nucleotidase, ecto (CD73) (NT5E)                                                                      | NM_002526     | 99%         | 557..2281 | 516                         |
| 108-H-F   | SEC14-like 1 ( <i>S. cerevisiae</i> ) (SEC14L1)                                                          | NM_003003     | 95%         | 268..2415 | 132                         |
| 108-I-F   | Eukaryotic Translation Elongation Factor 1 Alpha 1 (EEF1A1)                                              | NM_001402     | 99%         | 64..1452  | 12                          |
| 108-J-F   | Ribosomal Modification Protein Rimk-Like Family Member B (RIMKLB)                                        | NM_001297776  | 99%         | 455..1615 | 353                         |
| 129-D-F   | Vimentin (VIM)                                                                                           | NM_003380     | 99%         | 414..1814 | 279                         |
| 135-A-F   | Transmembrane Protein 57 (TMEM57)                                                                        | NM_018202     | 99%         | 242..2236 | 72                          |
| 135-B-F   | Lysosomal-Associated Membrane Protein 1 (LAMP1)                                                          | NM_005561     | 99%         | 282..1535 | 803                         |
| 135-H-F   | Wnt Ligand Secretion Mediator (WLS)                                                                      | NM_024911     | 95%         | 303..1928 | 108                         |
| 135-M-F   | Inhibitor of Growth Family, Member 3 (ING3)                                                              | NM_019071     | 99%         | 135..1391 | 37                          |
| 135-Q-F   | Signal Peptidase Complex Subunit 3 Homolog ( <i>S. cerevisiae</i> ) (SPCS3)                              | NM_021928     | 99%         | 139..681  | 51                          |
| 135-T-F   | V-Ral Simian Leukemia Viral Oncogene Homolog B (RALB)                                                    | NM_002881     | 95%         | 191..811  | 143                         |
| 136-B-F   | Zinc Finger, FYVE Domain Containing 16 (ZFYVE16)                                                         | NM_014733     | 99%         | 181..4800 | 34                          |
| 136-C-F   | Serpin Peptidase Inhibitor, Clade E (Nexin, Plasminogen Activator Inhibitor Type 1), Member 2 (SERPINE2) | NM_001136530  | 99%         | 138..1367 | 1070                        |
| 256-C-F   | Endothelial Cell Surface Expressed Chemotaxis and Apoptosis Regulator (ECSCR)                            | NM_001077693  | 95%         | 74..691   | 208                         |
| 256-E-F   | LIM and Senescent Cell Antigen-Like Domains 1 (LIMS1)                                                    | NM_001193485  | 95%         | 264..1427 | 130                         |
| 256-J-F   | Chaperonin Containing TCP1, Subunit 5 (Epsilon) (CCT5)                                                   | NM_012073     | 99%         | 172..1797 | 177                         |
| 256-L-F   | Deoxy Thymidylate Kinase (Thymidylate Kinase) (DTYMK)                                                    | NM_012145     | 99%         | 186..824  | 164                         |
| 256-P-F   | PHD Finger Protein 20 (PHF20)                                                                            | NM_016436     | 99%         | 112..3150 | 48                          |
| 256-Q-F   | Aldolase A, Fructose-Bisphosphate (ALDOA)                                                                | NM_184041     | 96%         | 277..1371 | 236                         |
| 256-S-F   | Anillin, Actin Binding Protein (ANLN)                                                                    | NM_018685     | 99%         | 225..3599 | 81                          |

|                |                                                                  |              |      |           |      |
|----------------|------------------------------------------------------------------|--------------|------|-----------|------|
| <b>265-A-F</b> | Poly(A) Binding Protein, Cytoplasmic 1 (PABPC1)                  | NM_002568    | 99%  | 505..2415 | 456  |
| <b>265-C-F</b> | Fumarate Hydratase (FH)                                          | NM_000143    | 99%  | 64..1596  | 98   |
| <b>265-D-F</b> | Estrogen Receptor Binding Site Associated, Antigen, 9 (EBAG9)    | NM_198120    | 100% | 236..877  | 199  |
| <b>265-E-F</b> | Ring Finger Protein 41, E3 Ubiquitin Protein Ligase (RNF41)      | NM_005785    | 99%  | 381..1334 | 548  |
| <b>265-G-F</b> | Zinc Finger, HIT-Type Containing 6 (ZNHIT6)                      | NM_017953    | 100% | 150..1562 | 15   |
| <b>265-J-F</b> | Histone Deacetylase 2 (HDAC2)                                    | NM_001527    | 99%  | 288..1754 | 800  |
| <b>265-Q-F</b> | Poly(A) Binding Protein, Cytoplasmic 4 (Inducible Form) (PABPC4) | NM_001135653 | 99%  | 899..2881 | 913  |
| <b>269-C-F</b> | Aspartyl Aminopeptidase (DNPEP)                                  | NM_012100    | 99%  | 147..1604 | 49   |
| <b>271-B-F</b> | Retinoic Acid Induced 14 (RAI14)                                 | NM_015577    | 100% | 197..3139 | 116  |
| <b>271-F-F</b> | Cyclin I (CCNI)                                                  | NM_006835    | 99%  | 545..1678 | 692  |
| <b>271-J-F</b> | DEAH (Asp-Glu-Ala-His) Box Polypeptide 32 (DHX32)                | NM_018180    | 96%  | 492..2723 | 243  |
| <b>272-A-F</b> | Kinectin 1 (Kinesin Receptor) (KTN1)                             | NM_001079521 | 99%  | 179..4252 | 82   |
| <b>272-D-F</b> | SAM and SH3 Domain Containing 1 (SASH1)                          | NM_015278    | 99%  | 476..4219 | 392  |
| <b>272-E-F</b> | Prolyl 3-Hydroxylase Family Member 4 (Non-Enzymatic) (P3H4)      | NM_006455    | 99%  | 285..1598 | 737  |
| <b>272-J-F</b> | TBC1 Domain Family, Member 4 (TBC1D4)                            | NM_014832    | 99%  | 348..4244 | 1676 |
| <b>278-B-F</b> | Kinesin Family Member 20B (KIF20B)                               | NM_001284259 | 95%  | 93..5555  | 2321 |
| <b>278-E-F</b> | TBC1 Domain Family, Member 22B (TBC1D22B)                        | NM_017772    | 99%  | 215..1732 | 1381 |
| <b>278-F-F</b> | Kinesin Light Chain 1 (Klc1)                                     | NM_005552    | 99%  | 309..1991 | 42   |
| <b>278-I-F</b> | Oxysterol Binding Protein-Like 9 (Osbp19)                        | NM_148904    | 93%  | 489..2165 | 34   |
| <b>278-J-F</b> | Sec1 Family Domain Containing 1 (Scfd1)                          | NM_016106    | 99%  | 86..2014  | 74   |
| <b>278-K-F</b> | Pyridoxal-Dependent Decarboxylase Domain Containing 1 (Pdxdc1)   | NM_015027    | 100% | 238..2604 | 477  |
| <b>278-L-F</b> | Pds5 Cohesin Associated Factor B (Pds5b)                         | NM_015032    | 99%  | 187..4530 | 857  |
| <b>284-A-F</b> | Unc-45 Homolog A (C. Elegans) (Unc45a)                           | NM_001039675 | 99%  | 836..3625 | 826  |
| <b>284-C-F</b> | Connective Tissue Growth Factor (Ctgf)                           | NM_001901    | 99%  | 207..1256 | 32   |
| <b>291-E-F</b> | Lysyl-Trna Synthetase (Kars)                                     | NM_001130089 | 99%  | 145..2022 | 699  |
| <b>291-F-F</b> | Eukaryotic Translation Elongation Factor 1 Gamma (Eef1g)         | NM_001404    | 99%  | 147..1460 | 149  |
| <b>291-H-F</b> | Aldehyde Dehydrogenase 3 Family,                                 | NM_001031806 | 99%  | 222..1748 | 1145 |

|                | Member A2 (Aldh3a2)                                                                                      |                |      |           |       |
|----------------|----------------------------------------------------------------------------------------------------------|----------------|------|-----------|-------|
| <b>297-G-F</b> | Chromobox Homolog 5 (CBX5)                                                                               | NM_012117      | 100% | 167..742  | 55    |
| <b>297-H-F</b> | Interferon, Gamma-Inducible Protein 16 (IFI16)                                                           | NM_005531      | 99%  | 291..2480 | 21    |
| <b>297-K-F</b> | Thioredoxin Reductase 1 (TXNRD1)                                                                         | NM_003330      | 99%  | 656..2311 | 666   |
| <b>297-N-F</b> | Enoyl-Coa Delta Isomerase 2 (ECI2)                                                                       | NM_006117      | 99%  | 118..1212 | 35    |
| <b>297-Q-F</b> | WD Repeat Domain 1 (WDR1)                                                                                | NM_017491      | 100% | 284..2104 | 1178  |
| <b>297-R-F</b> | Chromobox Homolog 1 (CBX1)                                                                               | NM_001127228   | 99%  | 292..849  | 99    |
| <b>297-T-F</b> | Tumor Protein, Translationally-Controlled 1 (TPT1)                                                       | NM_001286272   | 99%  | 216..809  | 124   |
| <b>297-U-F</b> | Ribosomal Protein S10 (RPS10)                                                                            | NM_001203245   | 95%  | 247..744  | 245   |
| <b>297-Y-F</b> | DEK Proto-Oncogene (DEK)                                                                                 | NM_003472      | 99%  | 194..1321 | 65    |
| <b>297-Z-F</b> | Serpin Peptidase Inhibitor, Clade E (Nexin, Plasminogen Activator Inhibitor Type 1), Member 1 (SERPINE1) | NM_000602      | 99%  | 158..1366 | 671   |
| <b>304-H-F</b> | Nuclear Export Mediator Factor (NEMF)                                                                    | NM_004713      | 99%  | 321..3551 | 2837  |
| <b>310-A-F</b> | Dihydrolipoamide Dehydrogenase (DLD)                                                                     | NM_000108      | 99%  | 145..1674 | 88    |
| <b>310-C-F</b> | Coiled-Coil Domain Containing 68 (CCDC68)                                                                | NM_025214      | 99%  | 276..1283 | 82    |
| <b>310-G-F</b> | Thioredoxin Domain Containing 5 (Endoplasmic Reticulum) (TXNDC5)                                         | NM_030810      | 99%  | 39..1337  | 45    |
| <b>310-I-F</b> | DDB1 and CUL4 Associated Factor 8 (DCAF8)                                                                | NM_015726      | 99%  | 213..2006 | 187   |
| <b>310-J-F</b> | Nuclear Receptor Binding SET Domain Protein 1 (NSD1)                                                     | NM_172349      | 99%  | 161..7444 | 1015  |
| <b>310-K-F</b> | Microtubule-Actin Crosslinking Factor 1 (MACF1)                                                          | NM_012090      | 95%  | 53..16345 | 11522 |
| <b>310-M-F</b> | Serologically Defined Colon Cancer Antigen 8 (SDCCAG8)                                                   | NM_006642      | 99%  | 170..2311 | 1251  |
| <b>310-N-F</b> | Eukaryotic Translation Initiation Factor 3, Subunit M (EIF3M)                                            | NM_006360      | 93%  | 122..1246 | 86    |
| <b>322-A-F</b> | BRCA1-Associated ATM Activator 1 (BRAT1)                                                                 | NM_152743      | 99%  | 289..2754 | 246   |
| <b>1A1a-3</b>  | COPI Coat Complex Subunit Beta 2 (COPB2)                                                                 | NM_004766.3    | 96%  | <1..>1582 | 782   |
| <b>2G1a-3</b>  | Scavenger Receptor Class B Member 2 (SCARB2)                                                             | NM_001204255.2 | 95%  | 282..1289 | 1358  |
| <b>2H2a-3</b>  | Triosephosphate Isomerase 1 (TPI1)                                                                       | NM_000365.6    | 92%  | 37..786   | 9     |
| <b>3A1a-3</b>  | Von Willebrand Factor (VWF)                                                                              | NM_000552.5    | 92%  | <1..>917  | 5290  |
| <b>3B1a</b>    | Cerebellar Degeneration Related Protein 2 Like (CDR2L)                                                   | NM_014603.3    | 92%  | 413..1810 | 1698  |
| <b>3B5a-3</b>  | Cadherin 5 (CDH5)                                                                                        | AB035304.1     | 95%  | 88..2442  | 1973  |
| <b>3B7a-3</b>  | Homo Sapiens Yippee Like 2 (YPEL2)                                                                       | NM_001005404.4 | 93%  | 252..611  | 3544  |

|               |                                                            |                |     |           |       |
|---------------|------------------------------------------------------------|----------------|-----|-----------|-------|
| <b>4G1a-3</b> | Pan Paniscus ADP Dependent Glucokinase (ADPGK)             | XM_008971902.2 | 93% | 31..>887  | 604   |
| <b>4H1a-3</b> | Serpin Family B Member 9 (SERPINB9)                        | XM_017010943.1 | 89% | 584..1561 | 3538  |
| <b>4H3a-3</b> | Activin A Receptor Like Type 1 (ACVRL1)                    | NM_001077401.2 | 93% | 93..1604  | 2633  |
| <b>4H5a-3</b> | ANTXR Cell Adhesion Molecule 2 (ANTXR2)                    | NM_001286781.2 | 91% |           | 2200  |
| <b>4I2a-3</b> | Integrin Subunit Beta 5 (ITGB5)                            | NM_002213.5    | 95% | 366..2765 | 1     |
| <b>4I4a-3</b> | Protein Phosphatase 2 Regulatory Subunit B'gamma (PPP2R5C) | NG_047069.1    | 92% |           | 86910 |
| <b>4J2a-3</b> | Ribonuclease P/MRP Subunit P25 Like (RPP25L)               | NM_148178.3    | 91% | 71..562   | 1     |

This table describes the gene full name (homology), accession No., query cover, CDS and start site of cloned region of total cDNA clones retrieved by NCBI BLAST. CDS is the abbreviation of coding sequence, which refers to the coding sequence region in mature mRNA that can be translated into protein, starting from the start codon and ending with the stop codon.
